# Supplementary material for: A property-oriented adaptive design framework for rapid discovery of energetic molecules based on small-scale labeled datasets
Source: Royal Society of Chemistry journal article supplement (doi:10.1039/d1ra03715c), 2021-01-01
Supplement: d1ra03715c2.xlsx [file d1ra03715c2.xlsx]

## Sheet: Table S1
Table S1. The Chemical structures and SMILES (Simplified molecular input line entry specification) of 88 parent rings.
Sl. No.	Structure	SMILES
1		O=c1cc[nH]c(=O)[nH]1
2		c1nnc(-c2nnco2)o1
3		c1n[nH]nc1-c1cn[nH]n1
4		c1n[nH]c2cn[nH]c12
5		c1n[nH]cc1Nc1nnc2nncn2n1
6		c1cnn(Cn2cccn2)c1
7		C1=NOC(c2cnon2)=NO1
8		c1nn2cnnc2[nH]1
9		c1cn[nH]c1
10		c1cnnnn1
11		c1nonc1-c1nonc1-c1cnon1
12		c1ccc2nonc2c1
13		c1cnon1
14		O=C1NC2NCNC2N1
15		c1c[nH]c(-c2ncc[nH]2)n1
16		c1cn2nccc2nn1
17		c1cnccn1
18		c1nnc(/N=N/c2nnco2)o1
19		c1ccc(-c2ccccc2)cc1
20		n1onc2c1Nc1nonc1N2
21		c1ncon1
22		c1cn2nnn3ccnc3c2n1
23		c1n[nH]c(-n2cncn2)n1
24		C1NC2NCNC2N1
25		c1ncn(/N=N/n2cncn2)n1
26		O=C1c2n[nH]nc2C(=O)c2n[nH]nc21
27		O=C1NC2NC(=O)NC2N1
28		O=C(C(=O)c1ccccc1)c1ccccc1
29		c1cnoc1
30		c1nc(-c2ncon2)no1
31		c1n[nH]nc1-c1nnn[nH]1
32		C1=NCC2(CN=CNC2)CN1
33		c1nn[nH]n1
34		c1cc2nnnn2c2nonc12
35		c1cc[nH]c1
36		C(c1nnn[nH]1)c1nnn[nH]1
37		c1nnn[nH]1
38		c1ncncn1
39		c1n[nH]c(-c2cnon2)n1
40		c1nc2c3ncnn3nnn2n1
41		c1ccnnc1
42		O=C1NC2NC3NC(=O)NC3NC2N1
43		O=c1[nH]c2ccccc2c2ccccc12
44		C(=C/c1ccccc1)\c1ccccc1
45		c1c[nH]nn1
46		O=c1[nH]nc2n1-c1ccccc1OC2
47		c1cnncn1
48		C1CNc2nonc2N1
49		C1N=NN=N1
50		c1ccc(-n2ccnc2)cc1
51		c1cc2nonc2c2nonc12
52		c1nnn(COCn2ncnn2)n1
53		c1nc[nH]n1
54		c1ccc(Nc2nnc[nH]2)cc1
55		O=c1ncnc[nH]1
56		c1ccc(Nc2ccccc2)cc1
57		O=c1[nH]cno1
58		c1nonc1-c1cnon1
59		c1nc(-c2nnn[nH]2)n[nH]1
60		O=C1OC2NCNC2O1
61		c1nnc(-c2nnc[nH]2)[nH]1
62		O=c1[nH]cn[nH]1
63		c1cnn(Cc2nnn[nH]2)c1
64		c1cnn(-c2ccn[nH]2)c1
65		c1c[nH]cn1
66		C1NC2C(N1)C1NCNC21
67		c1nc(-c2nnn[nH]2)no1
68		n1n[nH]c(-c2nnn[nH]2)n1
69		c1ccc(Nc2cnon2)cc1
70		c1ccc(-c2cnc[nH]2)cc1
71		O=C1NC2C(N1)C1NC(=O)NC21
72		O=C1OC2NCCNC2O1
73		c1nonc1/N=N/c1cnon1
74		O=c1[nH]c2ccccc2[nH]c1=O
75		c1cncnc1
76		c1cc(-c2ccn[nH]2)[nH]n1
77		c1cnnnc1
78		c1nonc1Oc1cnon1
79		c1noc(-c2cnon2)n1
80		c1nc(Cn2cnnn2)n[nH]1
81		c1nc(-c2cnon2)no1
82		c1ccc2[nH]nnc2c1
83		c1nc(-c2cnon2)n[nH]1
84		c1nonc1C1=NOC(c2cnon2)=NO1
85		O=C(OOC(=O)c1ccccc1)c1ccccc1
86		c1ccccc1
87		c1nc(-n2cnnn2)n[nH]1
88		c1cc(-c2cc[nH]n2)n[nH]1

## Sheet: Table S2
Table S2. The Chemical structures and SMILES (Simplified molecular input line entry specification) of 13 substituents.
Sl. No.	Structure	SMILES
1	0	N
2	-N(H)-NO2	N[N+](=O)[O-]
3	0	[N+](=O)[O-]
4	-O-NO2	O[N+](=O)[O-]
5	-CO-NH2	C(=O)N
6	-CO-N(H)-NO2	C(=O)N[N+](=O)[O-]
7	-CO-N-(NO2)2	C(=O)N([N+](=O)[O-])[N+](=O)[O-]
8	-OCO-NH2	OC(=O)N
9	-OCO-NH-NO2	OC(=O)N[N+](=O)[O-]
10	-OCO-N-(NO2)2	OC(=O)N([N+](=O)[O-])[N+](=O)[O-]
11	-C(NO2)2	C([N+](=O)[O-])[N+](=O)[O-]
12	-C(NO2)3	C([N+](=O)[O-])([N+](=O)[O-])[N+](=O)[O-]
13	-O-C(NO2)3	OC([N+](=O)[O-])([N+](=O)[O-])[N+](=O)[O-]

## Sheet: Table S3
Table S3. The chemical structures and descriptor matrix of the 88 initial compounds labeled.
Sl.No.	Structures	Descriptors
1		SOB	C-N	C:C	C:N	N-N	C=O	H-N	C-H	N:N	C-C	N=O	N-O	C:O	C=N	C-O	N:O	C/N	N=N	N/N	C/C	C=C	C\\C	O-O
			1	2	4	1	2	5	1	0	0	0	0	0	0	0	0	0	0	0	0	0	0	0
		Estate	≡C-	=C<	aCa-	aaCa	≡N	>NH-[+1]	=N-	aNa	>N-	-N<<	-OH	=O	-O-
			0	1	0	0	0	0	0	0	0	1	2	0	0
		CDS	OB	n_C	n_N	n_O1	n_O2	n_O3	n_H	NCratio	n_CNO2	n_NNO2	n_ONO	n_ONO2	n_CNN	n_CNO	n_CNH2
			-101.37	4	4	0	0	2	6	1	0	0	0	0	0	0	1
2		SOB	C-N	C:C	C:N	N-N	C=O	H-N	C-H	N:N	C-C	N=O	N-O	C:O	C=N	C-O	N:O	C/N	N=N	N/N	C/C	C=C	C\\C	O-O
			2	0	4	1	0	3	0	2	1	1	1	4	0	0	0	0	0	0	0	0	0	0
		Estate	≡C-	=C<	aCa-	aaCa	≡N	>NH-[+1]	=N-	aNa	>N-	-N<<	-OH	=O	-O-
			0	4	0	0	1	0	4	0	1	0	1	0	2
		CDS	OB	n_C	n_N	n_O1	n_O2	n_O3	n_H	NCratio	n_CNO2	n_NNO2	n_ONO	n_ONO2	n_CNN	n_CNO	n_CNH2
			-41.31	4	7	2	0	0	3	1.75	0	1	0	0	4	0	1
3		SOB	C-N	C:C	C:N	N-N	C=O	H-N	C-H	N:N	C-C	N=O	N-O	C:O	C=N	C-O	N:O	C/N	N=N	N/N	C/C	C=C	C\\C	O-O
			1	2	4	3	0	3	1	4	1	2	2	0	0	0	0	0	0	0	0	0	0	0
		Estate	≡C-	=C<	aCa-	aaCa	≡N	>NH-[+1]	=N-	aNa	>N-	-N<<	-OH	=O	-O-
			0	3	0	0	2	0	4	0	2	1	2	0	0
		CDS	OB	n_C	n_N	n_O1	n_O2	n_O3	n_H	NCratio	n_CNO2	n_NNO2	n_ONO	n_ONO2	n_CNN	n_CNO	n_CNH2
			-37.49	4	10	4	0	0	4	2.5	0	2	0	0	4	0	0
4		SOB	C-N	C:C	C:N	N-N	C=O	H-N	C-H	N:N	C-C	N=O	N-O	C:O	C=N	C-O	N:O	C/N	N=N	N/N	C/C	C=C	C\\C	O-O
			3	2	9	0	0	4	2	4	0	0	0	0	0	0	0	0	0	0	0	0	0	0
		Estate	≡C-	=C<	aCa-	aaCa	≡N	>NH-[+1]	=N-	aNa	>N-	-N<<	-OH	=O	-O-
			0	3	1	0	1	0	6	0	0	1	0	0	0
		CDS	OB	n_C	n_N	n_O1	n_O2	n_O3	n_H	NCratio	n_CNO2	n_NNO2	n_ONO	n_ONO2	n_CNN	n_CNO	n_CNH2
			-110.05	6	10	0	0	0	6	1.667	0	0	0	0	6	0	1
5		SOB	C-N	C:C	C:N	N-N	C=O	H-N	C-H	N:N	C-C	N=O	N-O	C:O	C=N	C-O	N:O	C/N	N=N	N/N	C/C	C=C	C\\C	O-O
			4	4	4	0	0	0	6	2	0	2	2	0	0	0	0	0	0	0	0	0	0	0
		Estate	≡C-	=C<	aCa-	aaCa	≡N	>NH-[+1]	=N-	aNa	>N-	-N<<	-OH	=O	-O-
			0	1	0	0	0	0	2	0	2	2	2	0	0
		CDS	OB	n_C	n_N	n_O1	n_O2	n_O3	n_H	NCratio	n_CNO2	n_NNO2	n_ONO	n_ONO2	n_CNN	n_CNO	n_CNH2
			-87.38	7	6	4	0	0	6	0.857	2	0	0	0	2	0	0
6		SOB	C-N	C:C	C:N	N-N	C=O	H-N	C-H	N:N	C-C	N=O	N-O	C:O	C=N	C-O	N:O	C/N	N=N	N/N	C/C	C=C	C\\C	O-O
			1	1	2	0	0	2	0	0	1	1	4	0	2	3	2	0	0	0	0	0	0	0
		Estate	≡C-	=C<	aCa-	aaCa	≡N	>NH-[+1]	=N-	aNa	>N-	-N<<	-OH	=O	-O-
			2	2	0	0	0	2	2	0	1	0	1	3	1
		CDS	OB	n_C	n_N	n_O1	n_O2	n_O3	n_H	NCratio	n_CNO2	n_NNO2	n_ONO	n_ONO2	n_CNN	n_CNO	n_CNH2
			-20.87	4	6	2	3	0	2	1.5	0	0	0	1	0	4	1
7		SOB	C-N	C:C	C:N	N-N	C=O	H-N	C-H	N:N	C-C	N=O	N-O	C:O	C=N	C-O	N:O	C/N	N=N	N/N	C/C	C=C	C\\C	O-O
			0	0	7	0	0	0	1	2	0	2	5	0	0	1	0	0	0	0	0	0	0	0
		Estate	≡C-	=C<	aCa-	aaCa	≡N	>NH-[+1]	=N-	aNa	>N-	-N<<	-OH	=O	-O-
			0	1	1	0	0	0	3	0	2	2	2	2	0
		CDS	OB	n_C	n_N	n_O1	n_O2	n_O3	n_H	NCratio	n_CNO2	n_NNO2	n_ONO	n_ONO2	n_CNN	n_CNO	n_CNH2
			-3.46	3	7	4	1	0	1	2.333	0	0	0	2	3	0	0
8		SOB	C-N	C:C	C:N	N-N	C=O	H-N	C-H	N:N	C-C	N=O	N-O	C:O	C=N	C-O	N:O	C/N	N=N	N/N	C/C	C=C	C\\C	O-O
			2	2	2	0	2	5	1	1	2	0	0	0	0	0	0	0	0	0	0	0	0	0
		Estate	≡C-	=C<	aCa-	aaCa	≡N	>NH-[+1]	=N-	aNa	>N-	-N<<	-OH	=O	-O-
			2	2	0	0	0	0	1	0	0	0	2	0	0
		CDS	OB	n_C	n_N	n_O1	n_O2	n_O3	n_H	NCratio	n_CNO2	n_NNO2	n_ONO	n_ONO2	n_CNN	n_CNO	n_CNH2
			-114.25	5	4	0	0	2	6	0.8	0	0	0	0	1	0	2
9		SOB	C-N	C:C	C:N	N-N	C=O	H-N	C-H	N:N	C-C	N=O	N-O	C:O	C=N	C-O	N:O	C/N	N=N	N/N	C/C	C=C	C\\C	O-O
			2	1	2	1	1	3	0	3	1	1	1	0	0	0	0	0	0	0	0	0	0	0
		Estate	≡C-	=C<	aCa-	aaCa	≡N	>NH-[+1]	=N-	aNa	>N-	-N<<	-OH	=O	-O-
			1	2	0	0	1	0	4	0	1	0	2	0	0
		CDS	OB	n_C	n_N	n_O1	n_O2	n_O3	n_H	NCratio	n_CNO2	n_NNO2	n_ONO	n_ONO2	n_CNN	n_CNO	n_CNH2
			-38.91	3	7	2	0	1	3	2.333	0	1	0	0	2	0	1
10		SOB	C-N	C:C	C:N	N-N	C=O	H-N	C-H	N:N	C-C	N=O	N-O	C:O	C=N	C-O	N:O	C/N	N=N	N/N	C/C	C=C	C\\C	O-O
			2	3	6	2	2	2	0	0	2	2	2	0	0	4	6	0	0	0	0	0	0	0
		Estate	≡C-	=C<	aCa-	aaCa	≡N	>NH-[+1]	=N-	aNa	>N-	-N<<	-OH	=O	-O-
			2	6	0	0	2	0	6	0	2	0	4	2	3
		CDS	OB	n_C	n_N	n_O1	n_O2	n_O3	n_H	NCratio	n_CNO2	n_NNO2	n_ONO	n_ONO2	n_CNN	n_CNO	n_CNH2
			-23.19	8	10	4	0	2	2	1.25	0	2	0	0	0	6	0
11		SOB	C-N	C:C	C:N	N-N	C=O	H-N	C-H	N:N	C-C	N=O	N-O	C:O	C=N	C-O	N:O	C/N	N=N	N/N	C/C	C=C	C\\C	O-O
			2	6	2	2	1	2	2	0	1	2	2	0	0	0	2	0	0	0	0	0	0	0
		Estate	≡C-	=C<	aCa-	aaCa	≡N	>NH-[+1]	=N-	aNa	>N-	-N<<	-OH	=O	-O-
			1	2	2	0	0	0	2	1	2	0	3	0	1
		CDS	OB	n_C	n_N	n_O1	n_O2	n_O3	n_H	NCratio	n_CNO2	n_NNO2	n_ONO	n_ONO2	n_CNN	n_CNO	n_CNH2
			-59.7	7	6	4	0	1	4	0.857	0	2	0	0	0	2	1
12		SOB	C-N	C:C	C:N	N-N	C=O	H-N	C-H	N:N	C-C	N=O	N-O	C:O	C=N	C-O	N:O	C/N	N=N	N/N	C/C	C=C	C\\C	O-O
			2	1	2	4	2	0	0	0	2	4	4	0	0	0	2	0	0	0	0	0	0	0
		Estate	≡C-	=C<	aCa-	aaCa	≡N	>NH-[+1]	=N-	aNa	>N-	-N<<	-OH	=O	-O-
			2	2	0	0	0	0	2	2	4	0	6	0	1
		CDS	OB	n_C	n_N	n_O1	n_O2	n_O3	n_H	NCratio	n_CNO2	n_NNO2	n_ONO	n_ONO2	n_CNN	n_CNO	n_CNH2
			14.29	4	8	8	0	2	0	2	0	4	0	0	0	2	0
13		SOB	C-N	C:C	C:N	N-N	C=O	H-N	C-H	N:N	C-C	N=O	N-O	C:O	C=N	C-O	N:O	C/N	N=N	N/N	C/C	C=C	C\\C	O-O
			10	0	0	0	2	7	3	0	1	0	1	0	0	1	0	0	0	0	0	0	0	0
		Estate	≡C-	=C<	aCa-	aaCa	≡N	>NH-[+1]	=N-	aNa	>N-	-N<<	-OH	=O	-O-
			2	0	0	1	3	0	0	1	0	0	2	1	0
		CDS	OB	n_C	n_N	n_O1	n_O2	n_O3	n_H	NCratio	n_CNO2	n_NNO2	n_ONO	n_ONO2	n_CNN	n_CNO	n_CNH2
			-95.01	5	6	0	1	2	10	1.2	0	0	0	0	0	0	2
14		SOB	C-N	C:C	C:N	N-N	C=O	H-N	C-H	N:N	C-C	N=O	N-O	C:O	C=N	C-O	N:O	C/N	N=N	N/N	C/C	C=C	C\\C	O-O
			2	2	8	0	2	6	2	0	1	0	0	0	0	4	0	0	0	0	0	0	0	0
		Estate	≡C-	=C<	aCa-	aaCa	≡N	>NH-[+1]	=N-	aNa	>N-	-N<<	-OH	=O	-O-
			2	4	0	0	0	0	2	0	0	0	2	2	0
		CDS	OB	n_C	n_N	n_O1	n_O2	n_O3	n_H	NCratio	n_CNO2	n_NNO2	n_ONO	n_ONO2	n_CNN	n_CNO	n_CNH2
			-101.56	8	6	0	0	2	8	0.75	0	0	0	0	0	0	2
15		SOB	C-N	C:C	C:N	N-N	C=O	H-N	C-H	N:N	C-C	N=O	N-O	C:O	C=N	C-O	N:O	C/N	N=N	N/N	C/C	C=C	C\\C	O-O
			2	3	5	2	2	2	2	2	0	2	2	0	0	4	0	0	0	0	0	0	0	0
		Estate	≡C-	=C<	aCa-	aaCa	≡N	>NH-[+1]	=N-	aNa	>N-	-N<<	-OH	=O	-O-
			2	2	1	0	2	0	3	0	2	1	4	2	0
		CDS	OB	n_C	n_N	n_O1	n_O2	n_O3	n_H	NCratio	n_CNO2	n_NNO2	n_ONO	n_ONO2	n_CNN	n_CNO	n_CNH2
			-39.02	7	8	4	0	2	4	1.143	0	2	0	0	3	0	0
16		SOB	C-N	C:C	C:N	N-N	C=O	H-N	C-H	N:N	C-C	N=O	N-O	C:O	C=N	C-O	N:O	C/N	N=N	N/N	C/C	C=C	C\\C	O-O
			2	2	4	2	1	2	2	0	0	2	2	0	0	2	0	0	0	0	0	0	0	0
		Estate	≡C-	=C<	aCa-	aaCa	≡N	>NH-[+1]	=N-	aNa	>N-	-N<<	-OH	=O	-O-
			1	2	0	0	0	0	2	1	2	0	3	1	0
		CDS	OB	n_C	n_N	n_O1	n_O2	n_O3	n_H	NCratio	n_CNO2	n_NNO2	n_ONO	n_ONO2	n_CNN	n_CNO	n_CNH2
			-39.34	5	6	4	0	1	4	1.2	0	2	0	0	0	0	1
17		SOB	C-N	C:C	C:N	N-N	C=O	H-N	C-H	N:N	C-C	N=O	N-O	C:O	C=N	C-O	N:O	C/N	N=N	N/N	C/C	C=C	C\\C	O-O
			2	0	4	4	2	0	0	2	0	4	4	4	0	4	0	2	1	0	0	0	0	0
		Estate	≡C-	=C<	aCa-	aaCa	≡N	>NH-[+1]	=N-	aNa	>N-	-N<<	-OH	=O	-O-
			2	4	0	0	0	2	4	2	4	0	6	2	2
		CDS	OB	n_C	n_N	n_O1	n_O2	n_O3	n_H	NCratio	n_CNO2	n_NNO2	n_ONO	n_ONO2	n_CNN	n_CNO	n_CNH2
			6.9	6	12	8	0	2	0	2	0	4	0	0	6	0	0
18		SOB	C-N	C:C	C:N	N-N	C=O	H-N	C-H	N:N	C-C	N=O	N-O	C:O	C=N	C-O	N:O	C/N	N=N	N/N	C/C	C=C	C\\C	O-O
			4	12	0	0	0	0	10	0	3	4	4	0	0	0	0	0	0	0	0	0	0	0
		Estate	≡C-	=C<	aCa-	aaCa	≡N	>NH-[+1]	=N-	aNa	>N-	-N<<	-OH	=O	-O-
			0	4	0	0	0	0	0	0	4	0	4	0	0
		CDS	OB	n_C	n_N	n_O1	n_O2	n_O3	n_H	NCratio	n_CNO2	n_NNO2	n_ONO	n_ONO2	n_CNN	n_CNO	n_CNH2
			-110.48	14	4	8	0	0	10	0.286	4	0	0	0	0	0	0
19		SOB	C-N	C:C	C:N	N-N	C=O	H-N	C-H	N:N	C-C	N=O	N-O	C:O	C=N	C-O	N:O	C/N	N=N	N/N	C/C	C=C	C\\C	O-O
			8	2	4	1	0	2	0	0	0	3	3	0	0	0	4	0	0	0	0	0	0	0
		Estate	≡C-	=C<	aCa-	aaCa	≡N	>NH-[+1]	=N-	aNa	>N-	-N<<	-OH	=O	-O-
			0	4	0	1	0	0	4	2	3	0	3	0	2
		CDS	OB	n_C	n_N	n_O1	n_O2	n_O3	n_H	NCratio	n_CNO2	n_NNO2	n_ONO	n_ONO2	n_CNN	n_CNO	n_CNH2
			-14.55	5	10	6	0	0	2	2	3	0	0	0	0	4	0
20		SOB	C-N	C:C	C:N	N-N	C=O	H-N	C-H	N:N	C-C	N=O	N-O	C:O	C=N	C-O	N:O	C/N	N=N	N/N	C/C	C=C	C\\C	O-O
			6	0	3	0	0	0	0	0	2	6	6	1	0	0	1	0	0	0	0	0	0	0
		Estate	≡C-	=C<	aCa-	aaCa	≡N	>NH-[+1]	=N-	aNa	>N-	-N<<	-OH	=O	-O-
			0	2	0	2	0	0	2	0	6	0	6	0	1
		CDS	OB	n_C	n_N	n_O1	n_O2	n_O3	n_H	NCratio	n_CNO2	n_NNO2	n_ONO	n_ONO2	n_CNN	n_CNO	n_CNH2
			21.74	4	8	12	1	0	0	2	6	0	0	0	0	1	0
21		SOB	C-N	C:C	C:N	N-N	C=O	H-N	C-H	N:N	C-C	N=O	N-O	C:O	C=N	C-O	N:O	C/N	N=N	N/N	C/C	C=C	C\\C	O-O
			6	3	8	0	0	0	2	3	0	6	6	0	0	4	0	0	0	0	0	0	0	0
		Estate	≡C-	=C<	aCa-	aaCa	≡N	>NH-[+1]	=N-	aNa	>N-	-N<<	-OH	=O	-O-
			0	2	2	2	0	0	4	0	6	2	6	2	0
		CDS	OB	n_C	n_N	n_O1	n_O2	n_O3	n_H	NCratio	n_CNO2	n_NNO2	n_ONO	n_ONO2	n_CNN	n_CNO	n_CNH2
			-9.8	8	12	12	0	0	2	1.5	6	0	0	0	0	0	0
22		SOB	C-N	C:C	C:N	N-N	C=O	H-N	C-H	N:N	C-C	N=O	N-O	C:O	C=N	C-O	N:O	C/N	N=N	N/N	C/C	C=C	C\\C	O-O
			3	0	8	1	0	2	1	2	0	2	2	0	0	0	0	0	0	0	0	0	0	0
		Estate	≡C-	=C<	aCa-	aaCa	≡N	>NH-[+1]	=N-	aNa	>N-	-N<<	-OH	=O	-O-
			0	3	0	0	1	0	4	0	2	1	2	0	0
		CDS	OB	n_C	n_N	n_O1	n_O2	n_O3	n_H	NCratio	n_CNO2	n_NNO2	n_ONO	n_ONO2	n_CNN	n_CNO	n_CNH2
			-36.51	4	9	4	0	0	3	2.25	1	1	0	0	2	0	0
23		SOB	C-N	C:C	C:N	N-N	C=O	H-N	C-H	N:N	C-C	N=O	N-O	C:O	C=N	C-O	N:O	C/N	N=N	N/N	C/C	C=C	C\\C	O-O
			9	0	0	1	0	5	4	0	1	2	3	0	0	1	0	0	0	0	0	0	0	0
		Estate	≡C-	=C<	aCa-	aaCa	≡N	>NH-[+1]	=N-	aNa	>N-	-N<<	-OH	=O	-O-
			0	0	0	1	5	0	0	0	2	0	2	1	0
		CDS	OB	n_C	n_N	n_O1	n_O2	n_O3	n_H	NCratio	n_CNO2	n_NNO2	n_ONO	n_ONO2	n_CNN	n_CNO	n_CNH2
			-51.05	4	7	4	1	0	9	1.75	0	1	0	1	0	0	0
24		SOB	C-N	C:C	C:N	N-N	C=O	H-N	C-H	N:N	C-C	N=O	N-O	C:O	C=N	C-O	N:O	C/N	N=N	N/N	C/C	C=C	C\\C	O-O
			2	0	8	1	1	3	2	2	1	1	1	0	0	0	0	0	1	2	0	0	0	0
		Estate	≡C-	=C<	aCa-	aaCa	≡N	>NH-[+1]	=N-	aNa	>N-	-N<<	-OH	=O	-O-
			1	2	0	0	1	2	4	0	1	2	2	0	0
		CDS	OB	n_C	n_N	n_O1	n_O2	n_O3	n_H	NCratio	n_CNO2	n_NNO2	n_ONO	n_ONO2	n_CNN	n_CNO	n_CNH2
			-56.92	5	11	2	0	1	5	2.2	0	1	0	0	2	0	1
25		SOB	C-N	C:C	C:N	N-N	C=O	H-N	C-H	N:N	C-C	N=O	N-O	C:O	C=N	C-O	N:O	C/N	N=N	N/N	C/C	C=C	C\\C	O-O
			2	2	4	3	3	2	0	4	4	2	2	0	0	0	0	0	0	0	0	0	0	0
		Estate	≡C-	=C<	aCa-	aaCa	≡N	>NH-[+1]	=N-	aNa	>N-	-N<<	-OH	=O	-O-
			3	4	0	0	2	0	4	0	2	2	5	0	0
		CDS	OB	n_C	n_N	n_O1	n_O2	n_O3	n_H	NCratio	n_CNO2	n_NNO2	n_ONO	n_ONO2	n_CNN	n_CNO	n_CNH2
			-37.87	7	10	4	0	3	2	1.429	0	2	0	0	4	0	0
26		SOB	C-N	C:C	C:N	N-N	C=O	H-N	C-H	N:N	C-C	N=O	N-O	C:O	C=N	C-O	N:O	C/N	N=N	N/N	C/C	C=C	C\\C	O-O
			9	0	0	4	3	4	1	0	2	3	3	0	0	0	0	0	0	0	0	0	0	0
		Estate	≡C-	=C<	aCa-	aaCa	≡N	>NH-[+1]	=N-	aNa	>N-	-N<<	-OH	=O	-O-
			3	0	0	1	4	0	0	2	3	0	6	0	0
		CDS	OB	n_C	n_N	n_O1	n_O2	n_O3	n_H	NCratio	n_CNO2	n_NNO2	n_ONO	n_ONO2	n_CNN	n_CNO	n_CNH2
			-16.72	5	9	6	0	3	5	1.8	0	3	0	0	0	0	0
27		SOB	C-N	C:C	C:N	N-N	C=O	H-N	C-H	N:N	C-C	N=O	N-O	C:O	C=N	C-O	N:O	C/N	N=N	N/N	C/C	C=C	C\\C	O-O
			2	12	0	1	3	3	8	0	3	1	1	0	0	2	0	0	0	0	0	0	0	0
		Estate	≡C-	=C<	aCa-	aaCa	≡N	>NH-[+1]	=N-	aNa	>N-	-N<<	-OH	=O	-O-
			3	4	0	0	1	0	0	0	1	0	4	1	0
		CDS	OB	n_C	n_N	n_O1	n_O2	n_O3	n_H	NCratio	n_CNO2	n_NNO2	n_ONO	n_ONO2	n_CNN	n_CNO	n_CNH2
			-143.44	15	3	2	0	3	11	0.2	0	1	0	0	0	0	1
28		SOB	C-N	C:C	C:N	N-N	C=O	H-N	C-H	N:N	C-C	N=O	N-O	C:O	C=N	C-O	N:O	C/N	N=N	N/N	C/C	C=C	C\\C	O-O
			2	2	1	2	1	2	1	0	0	2	2	1	0	2	1	0	0	0	0	0	0	0
		Estate	≡C-	=C<	aCa-	aaCa	≡N	>NH-[+1]	=N-	aNa	>N-	-N<<	-OH	=O	-O-
			1	2	0	0	2	0	1	0	2	0	3	1	1
		CDS	OB	n_C	n_N	n_O1	n_O2	n_O3	n_H	NCratio	n_CNO2	n_NNO2	n_ONO	n_ONO2	n_CNN	n_CNO	n_CNH2
			-17.17	4	5	4	1	1	3	1.25	0	2	0	0	0	1	0
29		SOB	C-N	C:C	C:N	N-N	C=O	H-N	C-H	N:N	C-C	N=O	N-O	C:O	C=N	C-O	N:O	C/N	N=N	N/N	C/C	C=C	C\\C	O-O
			2	0	6	3	1	1	0	0	1	3	3	2	0	2	2	0	0	0	0	0	0	0
		Estate	≡C-	=C<	aCa-	aaCa	≡N	>NH-[+1]	=N-	aNa	>N-	-N<<	-OH	=O	-O-
			1	4	0	0	1	0	4	1	3	0	4	1	2
		CDS	OB	n_C	n_N	n_O1	n_O2	n_O3	n_H	NCratio	n_CNO2	n_NNO2	n_ONO	n_ONO2	n_CNN	n_CNO	n_CNH2
			-2.31	5	9	6	2	1	1	1.8	0	3	0	0	0	2	0
30		SOB	C-N	C:C	C:N	N-N	C=O	H-N	C-H	N:N	C-C	N=O	N-O	C:O	C=N	C-O	N:O	C/N	N=N	N/N	C/C	C=C	C\\C	O-O
			2	1	4	2	0	2	1	5	2	3	3	0	0	0	0	0	0	0	0	0	0	0
		Estate	≡C-	=C<	aCa-	aaCa	≡N	>NH-[+1]	=N-	aNa	>N-	-N<<	-OH	=O	-O-
			0	3	0	0	1	0	5	0	3	1	3	0	0
		CDS	OB	n_C	n_N	n_O1	n_O2	n_O3	n_H	NCratio	n_CNO2	n_NNO2	n_ONO	n_ONO2	n_CNN	n_CNO	n_CNH2
			-18.6	4	11	6	0	0	3	2.75	2	1	0	0	3	0	0
31		SOB	C-N	C:C	C:N	N-N	C=O	H-N	C-H	N:N	C-C	N=O	N-O	C:O	C=N	C-O	N:O	C/N	N=N	N/N	C/C	C=C	C\\C	O-O
			10	0	0	1	0	3	8	0	4	4	4	0	2	2	0	0	0	0	0	0	0	0
		Estate	≡C-	=C<	aCa-	aaCa	≡N	>NH-[+1]	=N-	aNa	>N-	-N<<	-OH	=O	-O-
			1	0	0	2	3	2	0	0	4	0	4	1	0
		CDS	OB	n_C	n_N	n_O1	n_O2	n_O3	n_H	NCratio	n_CNO2	n_NNO2	n_ONO	n_ONO2	n_CNN	n_CNO	n_CNH2
			-53.04	8	9	8	0	0	11	1.125	3	1	0	0	0	0	0
32		SOB	C-N	C:C	C:N	N-N	C=O	H-N	C-H	N:N	C-C	N=O	N-O	C:O	C=N	C-O	N:O	C/N	N=N	N/N	C/C	C=C	C\\C	O-O
			1	1	8	0	1	2	1	5	1	0	0	0	0	0	0	0	0	0	0	0	0	0
		Estate	≡C-	=C<	aCa-	aaCa	≡N	>NH-[+1]	=N-	aNa	>N-	-N<<	-OH	=O	-O-
			1	1	2	0	0	0	6	0	0	2	1	0	0
		CDS	OB	n_C	n_N	n_O1	n_O2	n_O3	n_H	NCratio	n_CNO2	n_NNO2	n_ONO	n_ONO2	n_CNN	n_CNO	n_CNH2
			-81.93	5	9	0	0	1	3	1.8	0	0	0	0	2	0	1
33		SOB	C-N	C:C	C:N	N-N	C=O	H-N	C-H	N:N	C-C	N=O	N-O	C:O	C=N	C-O	N:O	C/N	N=N	N/N	C/C	C=C	C\\C	O-O
			1	14	2	0	1	1	6	0	0	2	3	0	0	1	0	0	0	0	0	0	0	0
		Estate	≡C-	=C<	aCa-	aaCa	≡N	>NH-[+1]	=N-	aNa	>N-	-N<<	-OH	=O	-O-
			0	2	4	0	0	0	0	0	2	0	3	1	0
		CDS	OB	n_C	n_N	n_O1	n_O2	n_O3	n_H	NCratio	n_CNO2	n_NNO2	n_ONO	n_ONO2	n_CNN	n_CNO	n_CNH2
			-124.9	13	3	4	1	1	7	0.231	1	0	0	1	0	0	0
34		SOB	C-N	C:C	C:N	N-N	C=O	H-N	C-H	N:N	C-C	N=O	N-O	C:O	C=N	C-O	N:O	C/N	N=N	N/N	C/C	C=C	C\\C	O-O
			2	12	0	0	1	2	10	0	1	1	1	0	0	0	0	0	0	0	1	1	1	0
		Estate	≡C-	=C<	aCa-	aaCa	≡N	>NH-[+1]	=N-	aNa	>N-	-N<<	-OH	=O	-O-
			2	3	0	0	0	0	0	0	1	0	2	0	0
		CDS	OB	n_C	n_N	n_O1	n_O2	n_O3	n_H	NCratio	n_CNO2	n_NNO2	n_ONO	n_ONO2	n_CNN	n_CNO	n_CNH2
			-196.95	15	2	2	0	1	12	0.133	1	0	0	0	0	0	1
35		SOB	C-N	C:C	C:N	N-N	C=O	H-N	C-H	N:N	C-C	N=O	N-O	C:O	C=N	C-O	N:O	C/N	N=N	N/N	C/C	C=C	C\\C	O-O
			2	1	2	1	1	2	0	2	1	2	2	0	0	0	0	0	0	0	0	0	0	0
		Estate	≡C-	=C<	aCa-	aaCa	≡N	>NH-[+1]	=N-	aNa	>N-	-N<<	-OH	=O	-O-
			1	2	0	0	1	0	2	0	2	0	3	0	0
		CDS	OB	n_C	n_N	n_O1	n_O2	n_O3	n_H	NCratio	n_CNO2	n_NNO2	n_ONO	n_ONO2	n_CNN	n_CNO	n_CNH2
			-15.84	3	6	4	0	1	2	2	1	1	0	0	1	0	0
36		SOB	C-N	C:C	C:N	N-N	C=O	H-N	C-H	N:N	C-C	N=O	N-O	C:O	C=N	C-O	N:O	C/N	N=N	N/N	C/C	C=C	C\\C	O-O
			2	6	4	3	2	0	5	1	2	3	3	0	0	2	0	0	0	0	0	0	0	0
		Estate	≡C-	=C<	aCa-	aaCa	≡N	>NH-[+1]	=N-	aNa	>N-	-N<<	-OH	=O	-O-
			1	4	0	0	0	0	1	1	3	2	5	1	0
		CDS	OB	n_C	n_N	n_O1	n_O2	n_O3	n_H	NCratio	n_CNO2	n_NNO2	n_ONO	n_ONO2	n_CNN	n_CNO	n_CNH2
			-58.85	10	7	6	0	2	5	0.7	0	3	0	0	1	0	0
37		SOB	C-N	C:C	C:N	N-N	C=O	H-N	C-H	N:N	C-C	N=O	N-O	C:O	C=N	C-O	N:O	C/N	N=N	N/N	C/C	C=C	C\\C	O-O
			2	1	4	0	1	2	1	1	0	1	1	0	0	2	0	0	0	0	0	0	0	0
		Estate	≡C-	=C<	aCa-	aaCa	≡N	>NH-[+1]	=N-	aNa	>N-	-N<<	-OH	=O	-O-
			1	2	0	0	0	0	3	0	1	0	2	1	0
		CDS	OB	n_C	n_N	n_O1	n_O2	n_O3	n_H	NCratio	n_CNO2	n_NNO2	n_ONO	n_ONO2	n_CNN	n_CNO	n_CNH2
			-47.56	4	5	2	0	1	3	1.25	1	0	0	0	2	0	1
38		SOB	C-N	C:C	C:N	N-N	C=O	H-N	C-H	N:N	C-C	N=O	N-O	C:O	C=N	C-O	N:O	C/N	N=N	N/N	C/C	C=C	C\\C	O-O
			6	1	2	1	1	3	2	0	1	2	2	0	0	2	2	0	0	0	0	0	0	0
		Estate	≡C-	=C<	aCa-	aaCa	≡N	>NH-[+1]	=N-	aNa	>N-	-N<<	-OH	=O	-O-
			1	2	0	0	3	0	2	0	2	0	3	1	1
		CDS	OB	n_C	n_N	n_O1	n_O2	n_O3	n_H	NCratio	n_CNO2	n_NNO2	n_ONO	n_ONO2	n_CNN	n_CNO	n_CNH2
			-32	5	7	4	0	1	5	1.4	1	1	0	0	0	2	0
39		SOB	C-N	C:C	C:N	N-N	C=O	H-N	C-H	N:N	C-C	N=O	N-O	C:O	C=N	C-O	N:O	C/N	N=N	N/N	C/C	C=C	C\\C	O-O
			4	7	4	0	0	0	7	0	1	3	3	0	0	0	0	0	0	0	0	0	0	0
		Estate	≡C-	=C<	aCa-	aaCa	≡N	>NH-[+1]	=N-	aNa	>N-	-N<<	-OH	=O	-O-
			0	3	0	0	0	0	1	0	3	1	3	0	0
		CDS	OB	n_C	n_N	n_O1	n_O2	n_O3	n_H	NCratio	n_CNO2	n_NNO2	n_ONO	n_ONO2	n_CNN	n_CNO	n_CNH2
			-95.55	10	5	6	0	0	7	0.5	3	0	0	0	0	0	0
40		SOB	C-N	C:C	C:N	N-N	C=O	H-N	C-H	N:N	C-C	N=O	N-O	C:O	C=N	C-O	N:O	C/N	N=N	N/N	C/C	C=C	C\\C	O-O
			6	0	0	1	0	0	0	0	1	4	4	0	0	0	0	0	2	0	0	0	0	0
		Estate	≡C-	=C<	aCa-	aaCa	≡N	>NH-[+1]	=N-	aNa	>N-	-N<<	-OH	=O	-O-
			0	0	0	2	0	4	0	0	4	0	4	0	0
		CDS	OB	n_C	n_N	n_O1	n_O2	n_O3	n_H	NCratio	n_CNO2	n_NNO2	n_ONO	n_ONO2	n_CNN	n_CNO	n_CNH2
			24.24	2	8	8	0	0	0	4	4	0	0	0	2	0	0
41		SOB	C-N	C:C	C:N	N-N	C=O	H-N	C-H	N:N	C-C	N=O	N-O	C:O	C=N	C-O	N:O	C/N	N=N	N/N	C/C	C=C	C\\C	O-O
			4	6	4	0	0	0	0	0	0	4	4	0	0	2	4	0	0	0	0	0	0	0
		Estate	≡C-	=C<	aCa-	aaCa	≡N	>NH-[+1]	=N-	aNa	>N-	-N<<	-OH	=O	-O-
			0	2	4	1	0	0	4	0	4	0	4	1	2
		CDS	OB	n_C	n_N	n_O1	n_O2	n_O3	n_H	NCratio	n_CNO2	n_NNO2	n_ONO	n_ONO2	n_CNN	n_CNO	n_CNH2
			-12.9	7	8	8	0	0	0	1.143	4	0	0	0	0	4	0
42		SOB	C-N	C:C	C:N	N-N	C=O	H-N	C-H	N:N	C-C	N=O	N-O	C:O	C=N	C-O	N:O	C/N	N=N	N/N	C/C	C=C	C\\C	O-O
			3	0	4	0	1	2	4	6	1	1	2	0	0	3	0	0	0	0	0	0	0	0
		Estate	≡C-	=C<	aCa-	aaCa	≡N	>NH-[+1]	=N-	aNa	>N-	-N<<	-OH	=O	-O-
			1	1	0	0	0	0	6	0	1	2	2	2	0
		CDS	OB	n_C	n_N	n_O1	n_O2	n_O3	n_H	NCratio	n_CNO2	n_NNO2	n_ONO	n_ONO2	n_CNN	n_CNO	n_CNH2
			-44.75	5	10	2	1	1	6	2	0	0	0	1	4	0	1
43		SOB	C-N	C:C	C:N	N-N	C=O	H-N	C-H	N:N	C-C	N=O	N-O	C:O	C=N	C-O	N:O	C/N	N=N	N/N	C/C	C=C	C\\C	O-O
			1	0	4	0	1	3	0	1	1	1	2	0	0	1	0	0	0	0	0	0	0	0
		Estate	≡C-	=C<	aCa-	aaCa	≡N	>NH-[+1]	=N-	aNa	>N-	-N<<	-OH	=O	-O-
			1	2	0	0	0	0	2	0	1	0	2	1	0
		CDS	OB	n_C	n_N	n_O1	n_O2	n_O3	n_H	NCratio	n_CNO2	n_NNO2	n_ONO	n_ONO2	n_CNN	n_CNO	n_CNH2
			-32.37	3	5	2	1	1	3	1.667	0	0	0	1	1	0	1
44		SOB	C-N	C:C	C:N	N-N	C=O	H-N	C-H	N:N	C-C	N=O	N-O	C:O	C=N	C-O	N:O	C/N	N=N	N/N	C/C	C=C	C\\C	O-O
			4	6	4	1	1	2	5	1	0	2	3	0	0	1	0	0	0	0	0	0	0	0
		Estate	≡C-	=C<	aCa-	aaCa	≡N	>NH-[+1]	=N-	aNa	>N-	-N<<	-OH	=O	-O-
			1	3	0	0	2	0	2	0	2	1	3	1	0
		CDS	OB	n_C	n_N	n_O1	n_O2	n_O3	n_H	NCratio	n_CNO2	n_NNO2	n_ONO	n_ONO2	n_CNN	n_CNO	n_CNH2
			-80.25	9	7	4	1	1	7	0.778	0	1	0	1	2	0	0
45		SOB	C-N	C:C	C:N	N-N	C=O	H-N	C-H	N:N	C-C	N=O	N-O	C:O	C=N	C-O	N:O	C/N	N=N	N/N	C/C	C=C	C\\C	O-O
			1	0	6	2	2	1	0	0	1	3	4	0	0	1	0	0	0	0	0	0	0	0
		Estate	≡C-	=C<	aCa-	aaCa	≡N	>NH-[+1]	=N-	aNa	>N-	-N<<	-OH	=O	-O-
			1	2	0	0	0	0	2	1	3	0	5	1	0
		CDS	OB	n_C	n_N	n_O1	n_O2	n_O3	n_H	NCratio	n_CNO2	n_NNO2	n_ONO	n_ONO2	n_CNN	n_CNO	n_CNH2
			2.75	4	7	6	1	2	1	1.75	0	2	0	1	0	0	0
46		SOB	C-N	C:C	C:N	N-N	C=O	H-N	C-H	N:N	C-C	N=O	N-O	C:O	C=N	C-O	N:O	C/N	N=N	N/N	C/C	C=C	C\\C	O-O
			3	12	0	0	1	3	8	0	0	1	2	0	0	3	0	0	0	0	0	0	0	0
		Estate	≡C-	=C<	aCa-	aaCa	≡N	>NH-[+1]	=N-	aNa	>N-	-N<<	-OH	=O	-O-
			1	4	0	0	1	0	0	0	1	0	2	2	0
		CDS	OB	n_C	n_N	n_O1	n_O2	n_O3	n_H	NCratio	n_CNO2	n_NNO2	n_ONO	n_ONO2	n_CNN	n_CNO	n_CNH2
			-146.68	13	3	2	1	1	11	0.231	0	0	0	1	0	0	1
47		SOB	C-N	C:C	C:N	N-N	C=O	H-N	C-H	N:N	C-C	N=O	N-O	C:O	C=N	C-O	N:O	C/N	N=N	N/N	C/C	C=C	C\\C	O-O
			1	0	3	2	2	0	0	0	0	3	5	1	0	2	1	0	0	0	0	0	0	0
		Estate	≡C-	=C<	aCa-	aaCa	≡N	>NH-[+1]	=N-	aNa	>N-	-N<<	-OH	=O	-O-
			1	1	0	0	0	0	1	1	3	1	5	2	1
		CDS	OB	n_C	n_N	n_O1	n_O2	n_O3	n_H	NCratio	n_CNO2	n_NNO2	n_ONO	n_ONO2	n_CNN	n_CNO	n_CNH2
			27.03	3	6	6	1	2	0	2	0	2	0	1	0	1	0
48		SOB	C-N	C:C	C:N	N-N	C=O	H-N	C-H	N:N	C-C	N=O	N-O	C:O	C=N	C-O	N:O	C/N	N=N	N/N	C/C	C=C	C\\C	O-O
			2	2	4	0	0	0	1	0	2	3	4	0	0	1	4	0	0	0	0	0	0	0
		Estate	≡C-	=C<	aCa-	aaCa	≡N	>NH-[+1]	=N-	aNa	>N-	-N<<	-OH	=O	-O-
			0	4	0	0	0	0	4	0	3	0	3	1	2
		CDS	OB	n_C	n_N	n_O1	n_O2	n_O3	n_H	NCratio	n_CNO2	n_NNO2	n_ONO	n_ONO2	n_CNN	n_CNO	n_CNH2
			-7.92	5	7	6	1	0	1	1.4	2	0	0	1	0	4	0
49		SOB	C-N	C:C	C:N	N-N	C=O	H-N	C-H	N:N	C-C	N=O	N-O	C:O	C=N	C-O	N:O	C/N	N=N	N/N	C/C	C=C	C\\C	O-O
			4	0	6	0	0	1	0	4	1	4	5	0	0	1	0	0	0	0	0	0	0	0
		Estate	≡C-	=C<	aCa-	aaCa	≡N	>NH-[+1]	=N-	aNa	>N-	-N<<	-OH	=O	-O-
			0	3	0	1	0	0	5	0	4	1	4	1	0
		CDS	OB	n_C	n_N	n_O1	n_O2	n_O3	n_H	NCratio	n_CNO2	n_NNO2	n_ONO	n_ONO2	n_CNN	n_CNO	n_CNH2
			2.31	4	11	8	1	0	1	2.75	3	0	0	1	2	0	0
50		SOB	C-N	C:C	C:N	N-N	C=O	H-N	C-H	N:N	C-C	N=O	N-O	C:O	C=N	C-O	N:O	C/N	N=N	N/N	C/C	C=C	C\\C	O-O
			7	0	0	0	1	1	3	0	1	4	6	0	0	6	0	0	0	0	0	0	0	0
		Estate	≡C-	=C<	aCa-	aaCa	≡N	>NH-[+1]	=N-	aNa	>N-	-N<<	-OH	=O	-O-
			1	0	0	1	1	0	0	1	4	0	5	4	0
		CDS	OB	n_C	n_N	n_O1	n_O2	n_O3	n_H	NCratio	n_CNO2	n_NNO2	n_ONO	n_ONO2	n_CNN	n_CNO	n_CNH2
			4.49	5	6	8	2	1	4	1.2	3	0	0	1	0	0	0
51		SOB	C-N	C:C	C:N	N-N	C=O	H-N	C-H	N:N	C-C	N=O	N-O	C:O	C=N	C-O	N:O	C/N	N=N	N/N	C/C	C=C	C\\C	O-O
			2	0	8	1	2	5	0	2	3	1	1	0	0	0	0	0	0	0	0	0	0	0
		Estate	≡C-	=C<	aCa-	aaCa	≡N	>NH-[+1]	=N-	aNa	>N-	-N<<	-OH	=O	-O-
			2	4	0	0	1	0	4	0	1	0	3	0	0
		CDS	OB	n_C	n_N	n_O1	n_O2	n_O3	n_H	NCratio	n_CNO2	n_NNO2	n_ONO	n_ONO2	n_CNN	n_CNO	n_CNH2
			-62.91	6	9	2	0	2	5	1.5	0	1	0	0	4	0	1
52		SOB	C-N	C:C	C:N	N-N	C=O	H-N	C-H	N:N	C-C	N=O	N-O	C:O	C=N	C-O	N:O	C/N	N=N	N/N	C/C	C=C	C\\C	O-O
			2	0	4	0	3	5	0	1	1	0	1	0	0	1	0	0	0	0	0	0	0	0
		Estate	≡C-	=C<	aCa-	aaCa	≡N	>NH-[+1]	=N-	aNa	>N-	-N<<	-OH	=O	-O-
			2	1	0	0	0	0	1	0	0	1	3	1	0
		CDS	OB	n_C	n_N	n_O1	n_O2	n_O3	n_H	NCratio	n_CNO2	n_NNO2	n_ONO	n_ONO2	n_CNN	n_CNO	n_CNH2
			-55.6	4	5	0	1	3	5	1.25	0	0	0	0	1	0	2
53		SOB	C-N	C:C	C:N	N-N	C=O	H-N	C-H	N:N	C-C	N=O	N-O	C:O	C=N	C-O	N:O	C/N	N=N	N/N	C/C	C=C	C\\C	O-O
			3	4	4	2	2	3	3	2	1	2	2	0	0	2	0	0	0	0	0	0	0	0
		Estate	≡C-	=C<	aCa-	aaCa	≡N	>NH-[+1]	=N-	aNa	>N-	-N<<	-OH	=O	-O-
			2	3	0	0	0	0	2	1	2	1	4	1	0
		CDS	OB	n_C	n_N	n_O1	n_O2	n_O3	n_H	NCratio	n_CNO2	n_NNO2	n_ONO	n_ONO2	n_CNN	n_CNO	n_CNH2
			-58.89	8	8	4	0	2	6	1	0	2	0	0	2	0	1
54		SOB	C-N	C:C	C:N	N-N	C=O	H-N	C-H	N:N	C-C	N=O	N-O	C:O	C=N	C-O	N:O	C/N	N=N	N/N	C/C	C=C	C\\C	O-O
			4	1	4	0	1	2	3	0	1	2	2	0	0	0	0	0	0	0	0	0	0	0
		Estate	≡C-	=C<	aCa-	aaCa	≡N	>NH-[+1]	=N-	aNa	>N-	-N<<	-OH	=O	-O-
			1	1	0	0	0	0	1	0	2	1	3	0	0
		CDS	OB	n_C	n_N	n_O1	n_O2	n_O3	n_H	NCratio	n_CNO2	n_NNO2	n_ONO	n_ONO2	n_CNN	n_CNO	n_CNH2
			-55.81	5	5	4	0	1	5	1	2	0	0	0	0	0	1
55		SOB	C-N	C:C	C:N	N-N	C=O	H-N	C-H	N:N	C-C	N=O	N-O	C:O	C=N	C-O	N:O	C/N	N=N	N/N	C/C	C=C	C\\C	O-O
			12	0	0	0	1	6	6	0	6	3	3	0	0	0	0	0	0	0	0	0	0	0
		Estate	≡C-	=C<	aCa-	aaCa	≡N	>NH-[+1]	=N-	aNa	>N-	-N<<	-OH	=O	-O-
			1	0	0	2	4	0	0	0	3	0	4	0	0
		CDS	OB	n_C	n_N	n_O1	n_O2	n_O3	n_H	NCratio	n_CNO2	n_NNO2	n_ONO	n_ONO2	n_CNN	n_CNO	n_CNH2
			-72.27	8	8	6	0	1	12	1	3	0	0	0	0	0	1
56		SOB	C-N	C:C	C:N	N-N	C=O	H-N	C-H	N:N	C-C	N=O	N-O	C:O	C=N	C-O	N:O	C/N	N=N	N/N	C/C	C=C	C\\C	O-O
			4	0	5	0	1	2	0	3	2	3	4	1	0	1	1	0	0	0	0	0	0	0
		Estate	≡C-	=C<	aCa-	aaCa	≡N	>NH-[+1]	=N-	aNa	>N-	-N<<	-OH	=O	-O-
			1	3	0	1	0	0	5	0	3	1	4	1	1
		CDS	OB	n_C	n_N	n_O1	n_O2	n_O3	n_H	NCratio	n_CNO2	n_NNO2	n_ONO	n_ONO2	n_CNN	n_CNO	n_CNH2
			-9.25	5	10	6	2	1	2	2	3	0	0	0	1	1	1
57		SOB	C-N	C:C	C:N	N-N	C=O	H-N	C-H	N:N	C-C	N=O	N-O	C:O	C=N	C-O	N:O	C/N	N=N	N/N	C/C	C=C	C\\C	O-O
			4	0	4	3	2	1	0	6	1	3	3	0	0	0	0	0	0	0	0	0	0	0
		Estate	≡C-	=C<	aCa-	aaCa	≡N	>NH-[+1]	=N-	aNa	>N-	-N<<	-OH	=O	-O-
			2	2	0	0	1	0	6	1	3	2	5	0	0
		CDS	OB	n_C	n_N	n_O1	n_O2	n_O3	n_H	NCratio	n_CNO2	n_NNO2	n_ONO	n_ONO2	n_CNN	n_CNO	n_CNH2
			-2.23	4	13	6	0	2	1	3.25	0	3	0	0	2	0	0
58		SOB	C-N	C:C	C:N	N-N	C=O	H-N	C-H	N:N	C-C	N=O	N-O	C:O	C=N	C-O	N:O	C/N	N=N	N/N	C/C	C=C	C\\C	O-O
			4	7	2	1	2	4	4	0	1	1	1	0	0	2	2	0	0	0	0	0	0	0
		Estate	≡C-	=C<	aCa-	aaCa	≡N	>NH-[+1]	=N-	aNa	>N-	-N<<	-OH	=O	-O-
			2	4	0	0	2	0	2	0	1	0	3	1	1
		CDS	OB	n_C	n_N	n_O1	n_O2	n_O3	n_H	NCratio	n_CNO2	n_NNO2	n_ONO	n_ONO2	n_CNN	n_CNO	n_CNH2
			-93.49	10	6	2	0	2	8	0.6	0	1	0	0	0	2	1
59		SOB	C-N	C:C	C:N	N-N	C=O	H-N	C-H	N:N	C-C	N=O	N-O	C:O	C=N	C-O	N:O	C/N	N=N	N/N	C/C	C=C	C\\C	O-O
			2	7	4	2	2	3	5	0	2	2	2	0	0	2	0	0	0	0	0	0	0	0
		Estate	≡C-	=C<	aCa-	aaCa	≡N	>NH-[+1]	=N-	aNa	>N-	-N<<	-OH	=O	-O-
			2	4	0	0	2	0	1	0	2	0	4	1	0
		CDS	OB	n_C	n_N	n_O1	n_O2	n_O3	n_H	NCratio	n_CNO2	n_NNO2	n_ONO	n_ONO2	n_CNN	n_CNO	n_CNH2
			-90.46	11	6	4	0	2	8	0.545	0	2	0	0	0	0	0
60		SOB	C-N	C:C	C:N	N-N	C=O	H-N	C-H	N:N	C-C	N=O	N-O	C:O	C=N	C-O	N:O	C/N	N=N	N/N	C/C	C=C	C\\C	O-O
			2	14	2	3	3	2	6	0	1	3	3	0	0	2	0	0	0	0	0	0	0	0
		Estate	≡C-	=C<	aCa-	aaCa	≡N	>NH-[+1]	=N-	aNa	>N-	-N<<	-OH	=O	-O-
			2	2	4	0	1	0	0	1	3	0	6	1	0
		CDS	OB	n_C	n_N	n_O1	n_O2	n_O3	n_H	NCratio	n_CNO2	n_NNO2	n_ONO	n_ONO2	n_CNN	n_CNO	n_CNH2
			-88.88	15	6	6	0	3	8	0.4	0	3	0	0	0	0	0
61		SOB	C-N	C:C	C:N	N-N	C=O	H-N	C-H	N:N	C-C	N=O	N-O	C:O	C=N	C-O	N:O	C/N	N=N	N/N	C/C	C=C	C\\C	O-O
			10	0	0	3	4	4	3	0	5	3	4	0	0	1	0	0	0	0	0	0	0	0
		Estate	≡C-	=C<	aCa-	aaCa	≡N	>NH-[+1]	=N-	aNa	>N-	-N<<	-OH	=O	-O-
			4	0	0	1	4	0	0	2	3	0	7	1	0
		CDS	OB	n_C	n_N	n_O1	n_O2	n_O3	n_H	NCratio	n_CNO2	n_NNO2	n_ONO	n_ONO2	n_CNN	n_CNO	n_CNH2
			-33.58	8	9	6	1	4	7	1.125	0	3	0	0	0	0	0
62		SOB	C-N	C:C	C:N	N-N	C=O	H-N	C-H	N:N	C-C	N=O	N-O	C:O	C=N	C-O	N:O	C/N	N=N	N/N	C/C	C=C	C\\C	O-O
			8	0	0	1	2	2	6	0	3	3	3	0	0	4	0	0	0	0	0	0	0	0
		Estate	≡C-	=C<	aCa-	aaCa	≡N	>NH-[+1]	=N-	aNa	>N-	-N<<	-OH	=O	-O-
			2	0	0	0	2	0	0	1	3	0	5	2	0
		CDS	OB	n_C	n_N	n_O1	n_O2	n_O3	n_H	NCratio	n_CNO2	n_NNO2	n_ONO	n_ONO2	n_CNN	n_CNO	n_CNH2
			-38.09	7	6	6	0	2	8	0.857	2	1	0	0	0	0	0
63		SOB	C-N	C:C	C:N	N-N	C=O	H-N	C-H	N:N	C-C	N=O	N-O	C:O	C=N	C-O	N:O	C/N	N=N	N/N	C/C	C=C	C\\C	O-O
			4	2	4	1	1	1	0	0	2	4	4	0	0	0	4	2	1	0	0	0	0	0
		Estate	≡C-	=C<	aCa-	aaCa	≡N	>NH-[+1]	=N-	aNa	>N-	-N<<	-OH	=O	-O-
			1	4	0	1	1	2	4	0	4	0	5	0	2
		CDS	OB	n_C	n_N	n_O1	n_O2	n_O3	n_H	NCratio	n_CNO2	n_NNO2	n_ONO	n_ONO2	n_CNN	n_CNO	n_CNH2
			-5.96	6	11	8	0	1	1	1.833	3	1	0	0	2	4	0
64		SOB	C-N	C:C	C:N	N-N	C=O	H-N	C-H	N:N	C-C	N=O	N-O	C:O	C=N	C-O	N:O	C/N	N=N	N/N	C/C	C=C	C\\C	O-O
			4	7	4	1	3	2	3	0	1	4	5	0	0	1	0	0	0	0	0	0	0	0
		Estate	≡C-	=C<	aCa-	aaCa	≡N	>NH-[+1]	=N-	aNa	>N-	-N<<	-OH	=O	-O-
			1	1	2	1	1	0	0	0	4	1	7	1	0
		CDS	OB	n_C	n_N	n_O1	n_O2	n_O3	n_H	NCratio	n_CNO2	n_NNO2	n_ONO	n_ONO2	n_CNN	n_CNO	n_CNH2
			-40.48	10	7	8	1	3	5	0.7	3	1	0	0	0	0	0
65		SOB	C-N	C:C	C:N	N-N	C=O	H-N	C-H	N:N	C-C	N=O	N-O	C:O	C=N	C-O	N:O	C/N	N=N	N/N	C/C	C=C	C\\C	O-O
			2	2	4	2	2	2	2	0	1	2	2	0	0	2	0	0	0	0	0	0	0	0
		Estate	≡C-	=C<	aCa-	aaCa	≡N	>NH-[+1]	=N-	aNa	>N-	-N<<	-OH	=O	-O-
			2	2	0	0	0	0	2	1	2	0	4	1	0
		CDS	OB	n_C	n_N	n_O1	n_O2	n_O3	n_H	NCratio	n_CNO2	n_NNO2	n_ONO	n_ONO2	n_CNN	n_CNO	n_CNH2
			-41.17	6	6	4	0	2	4	1	0	2	0	0	0	0	1
66		SOB	C-N	C:C	C:N	N-N	C=O	H-N	C-H	N:N	C-C	N=O	N-O	C:O	C=N	C-O	N:O	C/N	N=N	N/N	C/C	C=C	C\\C	O-O
			2	4	4	3	2	3	2	2	2	3	3	0	0	2	0	0	0	0	0	0	0	0
		Estate	≡C-	=C<	aCa-	aaCa	≡N	>NH-[+1]	=N-	aNa	>N-	-N<<	-OH	=O	-O-
			2	4	0	0	1	0	2	1	3	0	5	1	0
		CDS	OB	n_C	n_N	n_O1	n_O2	n_O3	n_H	NCratio	n_CNO2	n_NNO2	n_ONO	n_ONO2	n_CNN	n_CNO	n_CNH2
			-40.97	8	9	6	0	2	5	1.125	0	3	0	0	2	0	0
67		SOB	C-N	C:C	C:N	N-N	C=O	H-N	C-H	N:N	C-C	N=O	N-O	C:O	C=N	C-O	N:O	C/N	N=N	N/N	C/C	C=C	C\\C	O-O
			2	2	2	4	2	0	1	2	1	4	4	0	0	2	0	0	0	0	0	0	0	0
		Estate	≡C-	=C<	aCa-	aaCa	≡N	>NH-[+1]	=N-	aNa	>N-	-N<<	-OH	=O	-O-
			2	2	0	0	0	0	3	2	4	0	6	1	0
		CDS	OB	n_C	n_N	n_O1	n_O2	n_O3	n_H	NCratio	n_CNO2	n_NNO2	n_ONO	n_ONO2	n_CNN	n_CNO	n_CNH2
			2.2	5	9	8	0	2	1	1.8	0	4	0	0	2	0	0
68		SOB	C-N	C:C	C:N	N-N	C=O	H-N	C-H	N:N	C-C	N=O	N-O	C:O	C=N	C-O	N:O	C/N	N=N	N/N	C/C	C=C	C\\C	O-O
			3	2	4	2	1	0	1	0	2	4	4	0	0	2	4	0	0	0	0	0	0	0
		Estate	≡C-	=C<	aCa-	aaCa	≡N	>NH-[+1]	=N-	aNa	>N-	-N<<	-OH	=O	-O-
			1	4	0	0	0	0	4	1	4	0	5	1	2
		CDS	OB	n_C	n_N	n_O1	n_O2	n_O3	n_H	NCratio	n_CNO2	n_NNO2	n_ONO	n_ONO2	n_CNN	n_CNO	n_CNH2
			-2.05	6	9	8	0	1	1	1.5	2	2	0	0	0	4	0
69		SOB	C-N	C:C	C:N	N-N	C=O	H-N	C-H	N:N	C-C	N=O	N-O	C:O	C=N	C-O	N:O	C/N	N=N	N/N	C/C	C=C	C\\C	O-O
			4	1	5	2	1	0	0	0	3	5	5	1	0	0	3	0	0	0	0	0	0	0
		Estate	≡C-	=C<	aCa-	aaCa	≡N	>NH-[+1]	=N-	aNa	>N-	-N<<	-OH	=O	-O-
			1	4	0	1	0	0	4	1	5	0	6	0	2
		CDS	OB	n_C	n_N	n_O1	n_O2	n_O3	n_H	NCratio	n_CNO2	n_NNO2	n_ONO	n_ONO2	n_CNN	n_CNO	n_CNH2
			3.81	6	10	10	1	1	0	1.667	3	2	0	0	0	3	0
70		SOB	C-N	C:C	C:N	N-N	C=O	H-N	C-H	N:N	C-C	N=O	N-O	C:O	C=N	C-O	N:O	C/N	N=N	N/N	C/C	C=C	C\\C	O-O
			5	0	6	2	1	1	2	4	2	5	5	0	0	2	0	0	0	0	0	0	0	0
		Estate	≡C-	=C<	aCa-	aaCa	≡N	>NH-[+1]	=N-	aNa	>N-	-N<<	-OH	=O	-O-
			1	2	0	1	0	0	5	1	5	1	6	1	0
		CDS	OB	n_C	n_N	n_O1	n_O2	n_O3	n_H	NCratio	n_CNO2	n_NNO2	n_ONO	n_ONO2	n_CNN	n_CNO	n_CNH2
			-5.35	6	13	10	0	1	3	2.167	3	2	0	0	2	0	0
71		SOB	C-N	C:C	C:N	N-N	C=O	H-N	C-H	N:N	C-C	N=O	N-O	C:O	C=N	C-O	N:O	C/N	N=N	N/N	C/C	C=C	C\\C	O-O
			2	6	2	1	2	4	2	2	0	1	1	0	0	4	0	0	0	0	0	0	0	0
		Estate	≡C-	=C<	aCa-	aaCa	≡N	>NH-[+1]	=N-	aNa	>N-	-N<<	-OH	=O	-O-
			2	2	2	0	1	0	2	0	1	0	3	2	0
		CDS	OB	n_C	n_N	n_O1	n_O2	n_O3	n_H	NCratio	n_CNO2	n_NNO2	n_ONO	n_ONO2	n_CNN	n_CNO	n_CNH2
			-73.75	8	6	2	0	2	6	0.75	0	1	0	0	1	0	1
72		SOB	C-N	C:C	C:N	N-N	C=O	H-N	C-H	N:N	C-C	N=O	N-O	C:O	C=N	C-O	N:O	C/N	N=N	N/N	C/C	C=C	C\\C	O-O
			2	2	4	2	2	2	0	0	2	2	4	0	2	6	4	0	0	0	0	0	0	0
		Estate	≡C-	=C<	aCa-	aaCa	≡N	>NH-[+1]	=N-	aNa	>N-	-N<<	-OH	=O	-O-
			4	4	0	0	0	2	4	1	2	0	4	4	2
		CDS	OB	n_C	n_N	n_O1	n_O2	n_O3	n_H	NCratio	n_CNO2	n_NNO2	n_ONO	n_ONO2	n_CNN	n_CNO	n_CNH2
			-18.61	8	10	4	2	2	2	1.25	0	2	0	0	0	6	1
73		SOB	C-N	C:C	C:N	N-N	C=O	H-N	C-H	N:N	C-C	N=O	N-O	C:O	C=N	C-O	N:O	C/N	N=N	N/N	C/C	C=C	C\\C	O-O
			3	12	0	0	3	2	9	0	3	2	2	0	0	4	0	0	0	0	0	0	0	1
		Estate	≡C-	=C<	aCa-	aaCa	≡N	>NH-[+1]	=N-	aNa	>N-	-N<<	-OH	=O	-O-
			3	4	0	0	0	0	0	0	2	0	5	3	0
		CDS	OB	n_C	n_N	n_O1	n_O2	n_O3	n_H	NCratio	n_CNO2	n_NNO2	n_ONO	n_ONO2	n_CNN	n_CNO	n_CNH2
			-108.63	16	3	4	0	3	11	0.188	2	0	0	0	0	0	1
74		SOB	C-N	C:C	C:N	N-N	C=O	H-N	C-H	N:N	C-C	N=O	N-O	C:O	C=N	C-O	N:O	C/N	N=N	N/N	C/C	C=C	C\\C	O-O
			3	6	0	0	0	0	5	0	0	3	3	0	0	2	0	0	0	0	0	0	0	0
		Estate	≡C-	=C<	aCa-	aaCa	≡N	>NH-[+1]	=N-	aNa	>N-	-N<<	-OH	=O	-O-
			0	1	0	1	0	0	0	0	3	0	3	1	0
		CDS	OB	n_C	n_N	n_O1	n_O2	n_O3	n_H	NCratio	n_CNO2	n_NNO2	n_ONO	n_ONO2	n_CNN	n_CNO	n_CNH2
			-62.55	7	3	6	0	0	5	0.429	3	0	0	0	0	0	0
75		SOB	C-N	C:C	C:N	N-N	C=O	H-N	C-H	N:N	C-C	N=O	N-O	C:O	C=N	C-O	N:O	C/N	N=N	N/N	C/C	C=C	C\\C	O-O
			5	0	6	0	1	3	0	4	0	3	3	0	0	4	0	0	0	0	0	0	0	0
		Estate	≡C-	=C<	aCa-	aaCa	≡N	>NH-[+1]	=N-	aNa	>N-	-N<<	-OH	=O	-O-
			1	3	0	1	0	0	5	0	3	1	4	2	0
		CDS	OB	n_C	n_N	n_O1	n_O2	n_O3	n_H	NCratio	n_CNO2	n_NNO2	n_ONO	n_ONO2	n_CNN	n_CNO	n_CNH2
			-11.08	5	11	6	0	1	3	2.2	3	0	0	0	2	0	1
76		SOB	C-N	C:C	C:N	N-N	C=O	H-N	C-H	N:N	C-C	N=O	N-O	C:O	C=N	C-O	N:O	C/N	N=N	N/N	C/C	C=C	C\\C	O-O
			2	4	4	3	2	3	2	2	1	3	3	0	0	4	0	0	0	0	0	0	0	0
		Estate	≡C-	=C<	aCa-	aaCa	≡N	>NH-[+1]	=N-	aNa	>N-	-N<<	-OH	=O	-O-
			2	4	0	0	1	0	2	1	3	0	5	2	0
		CDS	OB	n_C	n_N	n_O1	n_O2	n_O3	n_H	NCratio	n_CNO2	n_NNO2	n_ONO	n_ONO2	n_CNN	n_CNO	n_CNH2
			-35.14	8	9	6	0	2	5	1.125	0	3	0	0	2	0	0
77		SOB	C-N	C:C	C:N	N-N	C=O	H-N	C-H	N:N	C-C	N=O	N-O	C:O	C=N	C-O	N:O	C/N	N=N	N/N	C/C	C=C	C\\C	O-O
			6	1	5	0	0	0	0	0	2	6	6	1	0	2	3	0	0	0	0	0	0	0
		Estate	≡C-	=C<	aCa-	aaCa	≡N	>NH-[+1]	=N-	aNa	>N-	-N<<	-OH	=O	-O-
			0	4	0	2	0	0	4	0	6	0	6	1	2
		CDS	OB	n_C	n_N	n_O1	n_O2	n_O3	n_H	NCratio	n_CNO2	n_NNO2	n_ONO	n_ONO2	n_CNN	n_CNO	n_CNH2
			10.62	6	10	12	1	0	0	1.667	6	0	0	0	0	3	0
78		SOB	C-N	C:C	C:N	N-N	C=O	H-N	C-H	N:N	C-C	N=O	N-O	C:O	C=N	C-O	N:O	C/N	N=N	N/N	C/C	C=C	C\\C	O-O
			3	3	4	1	0	3	1	2	0	3	3	0	0	2	0	0	0	0	0	0	0	0
		Estate	≡C-	=C<	aCa-	aaCa	≡N	>NH-[+1]	=N-	aNa	>N-	-N<<	-OH	=O	-O-
			0	1	2	1	0	0	2	0	3	1	3	1	0
		CDS	OB	n_C	n_N	n_O1	n_O2	n_O3	n_H	NCratio	n_CNO2	n_NNO2	n_ONO	n_ONO2	n_CNN	n_CNO	n_CNH2
			-27.78	5	8	6	0	0	4	1.6	3	0	0	0	2	0	0
79		SOB	C-N	C:C	C:N	N-N	C=O	H-N	C-H	N:N	C-C	N=O	N-O	C:O	C=N	C-O	N:O	C/N	N=N	N/N	C/C	C=C	C\\C	O-O
			3	4	5	1	0	1	1	3	1	3	3	0	0	0	2	0	0	0	0	0	0	0
		Estate	≡C-	=C<	aCa-	aaCa	≡N	>NH-[+1]	=N-	aNa	>N-	-N<<	-OH	=O	-O-
			0	2	3	0	1	0	5	0	3	1	3	0	1
		CDS	OB	n_C	n_N	n_O1	n_O2	n_O3	n_H	NCratio	n_CNO2	n_NNO2	n_ONO	n_ONO2	n_CNN	n_CNO	n_CNH2
			-29.45	6	10	6	0	0	2	1.667	2	1	0	0	1	2	0
80		SOB	C-N	C:C	C:N	N-N	C=O	H-N	C-H	N:N	C-C	N=O	N-O	C:O	C=N	C-O	N:O	C/N	N=N	N/N	C/C	C=C	C\\C	O-O
			3	3	2	1	1	1	3	0	0	2	2	0	0	0	0	0	0	0	0	0	0	0
		Estate	≡C-	=C<	aCa-	aaCa	≡N	>NH-[+1]	=N-	aNa	>N-	-N<<	-OH	=O	-O-
			1	1	0	0	1	0	0	0	2	1	3	0	0
		CDS	OB	n_C	n_N	n_O1	n_O2	n_O3	n_H	NCratio	n_CNO2	n_NNO2	n_ONO	n_ONO2	n_CNN	n_CNO	n_CNH2
			-55.99	5	4	4	0	1	4	0.8	1	1	0	0	0	0	0
81		SOB	C-N	C:C	C:N	N-N	C=O	H-N	C-H	N:N	C-C	N=O	N-O	C:O	C=N	C-O	N:O	C/N	N=N	N/N	C/C	C=C	C\\C	O-O
			1	0	4	0	1	4	0	6	3	1	2	0	0	1	0	0	0	0	0	0	0	0
		Estate	≡C-	=C<	aCa-	aaCa	≡N	>NH-[+1]	=N-	aNa	>N-	-N<<	-OH	=O	-O-
			1	2	0	1	0	0	6	0	1	0	2	1	0
		CDS	OB	n_C	n_N	n_O1	n_O2	n_O3	n_H	NCratio	n_CNO2	n_NNO2	n_ONO	n_ONO2	n_CNN	n_CNO	n_CNH2
			-37.49	4	10	2	1	1	4	2.5	0	0	0	1	2	0	1
82		SOB	C-N	C:C	C:N	N-N	C=O	H-N	C-H	N:N	C-C	N=O	N-O	C:O	C=N	C-O	N:O	C/N	N=N	N/N	C/C	C=C	C\\C	O-O
			5	0	2	0	1	2	0	3	1	3	3	0	0	0	0	0	0	0	0	0	0	0
		Estate	≡C-	=C<	aCa-	aaCa	≡N	>NH-[+1]	=N-	aNa	>N-	-N<<	-OH	=O	-O-
			1	1	0	1	0	0	3	0	3	1	4	0	0
		CDS	OB	n_C	n_N	n_O1	n_O2	n_O3	n_H	NCratio	n_CNO2	n_NNO2	n_ONO	n_ONO2	n_CNN	n_CNO	n_CNH2
			0	3	8	6	0	1	2	2.667	3	0	0	0	1	0	1
83		SOB	C-N	C:C	C:N	N-N	C=O	H-N	C-H	N:N	C-C	N=O	N-O	C:O	C=N	C-O	N:O	C/N	N=N	N/N	C/C	C=C	C\\C	O-O
			2	0	6	2	1	2	1	0	1	2	2	0	0	0	0	0	0	0	0	0	0	0
		Estate	≡C-	=C<	aCa-	aaCa	≡N	>NH-[+1]	=N-	aNa	>N-	-N<<	-OH	=O	-O-
			1	2	0	0	2	0	3	0	2	0	3	0	0
		CDS	OB	n_C	n_N	n_O1	n_O2	n_O3	n_H	NCratio	n_CNO2	n_NNO2	n_ONO	n_ONO2	n_CNN	n_CNO	n_CNH2
			-31.44	4	7	4	0	1	3	1.75	0	2	0	0	0	0	0
84		SOB	C-N	C:C	C:N	N-N	C=O	H-N	C-H	N:N	C-C	N=O	N-O	C:O	C=N	C-O	N:O	C/N	N=N	N/N	C/C	C=C	C\\C	O-O
			2	1	6	3	2	1	1	1	2	3	4	0	0	1	2	0	0	0	0	0	0	0
		Estate	≡C-	=C<	aCa-	aaCa	≡N	>NH-[+1]	=N-	aNa	>N-	-N<<	-OH	=O	-O-
			2	3	0	0	1	0	4	1	3	1	5	1	1
		CDS	OB	n_C	n_N	n_O1	n_O2	n_O3	n_H	NCratio	n_CNO2	n_NNO2	n_ONO	n_ONO2	n_CNN	n_CNO	n_CNH2
			-12.83	6	10	6	1	2	2	1.667	0	3	0	0	1	2	0
85		SOB	C-N	C:C	C:N	N-N	C=O	H-N	C-H	N:N	C-C	N=O	N-O	C:O	C=N	C-O	N:O	C/N	N=N	N/N	C/C	C=C	C\\C	O-O
			2	3	2	1	1	3	2	1	0	1	1	0	0	2	0	0	0	0	0	0	0	0
		Estate	≡C-	=C<	aCa-	aaCa	≡N	>NH-[+1]	=N-	aNa	>N-	-N<<	-OH	=O	-O-
			1	2	0	0	1	0	2	0	1	0	2	1	0
		CDS	OB	n_C	n_N	n_O1	n_O2	n_O3	n_H	NCratio	n_CNO2	n_NNO2	n_ONO	n_ONO2	n_CNN	n_CNO	n_CNH2
			-68.33	5	5	2	0	1	5	1	0	1	0	0	2	0	1
86		SOB	C-N	C:C	C:N	N-N	C=O	H-N	C-H	N:N	C-C	N=O	N-O	C:O	C=N	C-O	N:O	C/N	N=N	N/N	C/C	C=C	C\\C	O-O
			13	0	0	0	3	8	2	0	2	1	2	0	0	3	0	0	0	0	0	0	0	0
		Estate	≡C-	=C<	aCa-	aaCa	≡N	>NH-[+1]	=N-	aNa	>N-	-N<<	-OH	=O	-O-
			3	0	0	2	6	0	0	0	1	0	4	2	0
		CDS	OB	n_C	n_N	n_O1	n_O2	n_O3	n_H	NCratio	n_CNO2	n_NNO2	n_ONO	n_ONO2	n_CNN	n_CNO	n_CNH2
			-60.36	7	8	2	1	3	10	1.143	0	0	0	1	0	0	1
87		SOB	C-N	C:C	C:N	N-N	C=O	H-N	C-H	N:N	C-C	N=O	N-O	C:O	C=N	C-O	N:O	C/N	N=N	N/N	C/C	C=C	C\\C	O-O
			6	0	0	1	0	2	0	0	1	3	3	0	0	0	0	0	2	0	0	0	0	0
		Estate	≡C-	=C<	aCa-	aaCa	≡N	>NH-[+1]	=N-	aNa	>N-	-N<<	-OH	=O	-O-
			0	0	0	2	0	4	0	0	3	0	3	0	0
		CDS	OB	n_C	n_N	n_O1	n_O2	n_O3	n_H	NCratio	n_CNO2	n_NNO2	n_ONO	n_ONO2	n_CNN	n_CNO	n_CNH2
			6.84	2	8	6	0	0	2	4	3	0	0	0	2	0	1
88		SOB	C-N	C:C	C:N	N-N	C=O	H-N	C-H	N:N	C-C	N=O	N-O	C:O	C=N	C-O	N:O	C/N	N=N	N/N	C/C	C=C	C\\C	O-O
			4	6	2	0	0	1	2	2	0	4	4	0	0	2	0	0	0	0	0	0	0	0
		Estate	≡C-	=C<	aCa-	aaCa	≡N	>NH-[+1]	=N-	aNa	>N-	-N<<	-OH	=O	-O-
			0	2	2	1	0	0	2	0	4	0	4	1	0
		CDS	OB	n_C	n_N	n_O1	n_O2	n_O3	n_H	NCratio	n_CNO2	n_NNO2	n_ONO	n_ONO2	n_CNN	n_CNO	n_CNH2
			-31.61	7	7	8	0	0	3	1	4	0	0	0	1	0	0

## Sheet: Table S4
Table S4. Comparisons of prediction accuracies between different combinations of five types of descriptors and six regression algorithms for the heat of explosion as the target property.
Modelsa	Descriptors	MAEtrainb	MAEtestc	RMSEtraind	RMSEteste	R2trainf	R2testg
Lin	SOB	91.9±5.0	134.1±19.4	129.8±7.8	184.6±28.2	0.82±0.03	0.61±0.20
	CDS	95.3±7.1	131.8±21.3	132.0±9.0	178.3±32.4	0.81±0.03	0.63±0.19
	E-state	104.4±14.6	140.1±26.3	140.3±14.6	184.6±33.7	0.79±0.05	0.61±0.20
	E-state+SOB	89.6±6.1	156.5±23.1	123.8±7.9	210.8±34.6	0.84±0.03	0.47±0.33
	CDS+E-state+SOB	94.3±21.9	141.2±28.7	128.6±24.5	188.6±39.3	0.82±0.07	0.58±0.27
LASSO	SOB	108.0±17.8	138.0±25.1	149.0±20.5	184.4±33.9	076±0.08	0.63±0.16
	CDS	106.6±16.0	136.0±25.4	147.3±19.6	180.8±34.9	0.76±0.08	0.64±0.16
	E-state	121.1±27.8	146.3±33.1	163.6±33.2	192.9±41.6	0.70±0.13	0.59±0.19
	E-state+SOB	108.8±17.6	141.6±23.5	148.0±20.2	188.5±31.2	0.76±0.07	0.61±0.18
	CDS+E-state+SOB	114.8±31.3	141.8±36.8	156.8±37.2	188.1±47.3	0.72±0.14	0.61±0.20
KRR	SOB	52.7±12.8	100.8±19.7	77.3±19.8	143.0±37.0	0.94±0.03	0.74±0.19
	CDS	49.7±11.2	96.2±21.1	67.9±18.1	136.2±57.0	0.95±0.03	0.75±0.33
	E-state	61.3±28.9	113.5±33.5	81.9±38.6	153.0±56.5	0.94±0.04	0.75±0.21
	E-state+SOB	50.8±15.9	99.4±21.3	74.5±22.9	141.3±38.1	0.93±0.03	0.75±0.19
	CDS+E-state+SOB	26.2±9.0	69.5±15.6	33.7±11.1	88.8±21.4	0.99±0.01	0.90±0.05
SVR.lin	SOB	98.7±13.7	124.7±32.2	154.2±16.5	177.2±44.0	0.76±0.05	0.52±0.30
	CDS	97.7±9.9	126.6±28.1	147.1±13.4	175.3±42.9	0.78±0.05	0.52±0.32
	E-state	111.8±18.2	142.2±35.5	163.2±17.7	192.6±43.7	0.73±0.06	0.43±0.40
	E-state+SOB	97.6±11.0	135.3±28.4	148.3±11.7	191.2±46.8	0.77±0.03	0.55±0.29
	CDS+E-state+SOB	72±12.6	109.9±25.1	126.3±15.4	160.0±44.2	0.84±0.04	0.59±0.30
SVR.rbf	SOB	75.9±19.2	142.6±30.4	136.9±21.8	198.2±46.3	0.80±0.06	0.54±0.22
	CDS	102.6±31.4	151.5±35.5	151.9±25.5	199.4±50.7	0.76±0.08	0.54±0.25
	E-state	119.7±38.3	170.5±44.3	176.5±43.1	222.9±58.6	0.66±0.16	0.42±0.28
	E-state+SOB	110.0±38.7	163.3±43.6	170.7±40.4	216.0±58.0	0.68±0.15	0.46±0.27
	CDS+E-state+SOB	109.8±35.1	160.0±42.4	166.4±37.8	209.7±56.9	0.70±0.14	0.49±0.26
GPR	SOB	23.8±17.7	100.3±17.4	35.3±27.1	143.7±35.9	0.98±0.02	0.75±0.15
	CDS	34.4±16.5	93.1±18.4	45.6±21.9	130.5±40.8	0.97±0.02	0.79±0.15
	E-state	37.1±19.4	105.8±27.0	49.1±25.6	144.3±43.49	0.97±0.02	0.74±0.17
	E-state+SOB	14.7±17.7	99.8±18.2	22.1±27.1	143.8±36.0	0.99±0.02	0.75±0.16
	CDS+E-state+SOB	32.6±19.4	93.0±41.6	43.0±25.7	130.3±57.9	0.97±0.02	0.79±0.21
a The ShuffleSplit method was used to divide the training set and the test set of 88 compounds (80% of the data set was used for the training set and 20% for the test set). The data set was divided 20 times in total to obtain the average value of the model evaluation index. b Mean average error on the training set. c Mean average error on the test set. d Root Mean Squared Error on the training se…
